# Supplementary material for: Organophosphate esters uptake, translocation and accumulation in rice (Oryza sativa L.): impacts of lipid transporters and chemical properties
Source: Royal Society of Chemistry journal article supplement (doi:10.1039/d4em00132j), 2024-01-01
Supplement: d4em00132j1.pdf [file d4em00132j1.pdf]

**Organophosphate esters uptake, translocation and accumulation in rice (*Oryza sativa* L.): Impacts of lipid transporters and chemical properties**

Wenxuan Wang<sup>1</sup> Haiou Wang<sup>1</sup>✉ Xiaoyu Ren<sup>1</sup> Wenxiao Zhang<sup>1</sup> Qian Li<sup>1</sup>

---

✉ Haiou Wang  
wanghaiou@ustb.edu.cn

<sup>1</sup> University of Science and Technology Beijing, School of Chemistry and Biological Engineering,  
Department of Biological Science and Engineering, China

## Supplementary Information include:

### Experimental set up

### Tables and figures

**Table S1** Type, Names, structures, formula and properties of the OPEs in the present study

**Table S2** Types, Abbreviation, Name and Accession of the lipid transporter in the present study

**Table S3** Subcellular localization prediction of lipid transporters

**Table S4** The lipid transporter structural assessment by Procheck and ProSA

**Table S5** OPE congeners confirmation and quantitation ions and retention times (RT)

**Table S6** Scalar recovery and method detection limit (MDL) of seven different OPEs

**Table S7** Gene ID of 6 lipid transporters and their primers used in qPCR

**Table S8** Analysis of covariance results of OPEs binding affinities with numbers of benzene rings, carbon in main chain, Halogenated group and  $\log K_{ow}$

**Fig. S1** (A) conserved motifs, (B) Phylogenetic analysis, (C) conserved domains of 20 lipid transporters.

**Fig. S2** (A) The chromatogram and (B) standard curve of 7 different OPEs.

**Fig. S3** Binding affinities Heatmap showing 20 lipid transporters to 30 OPEs and average binding affinity of 30 OPEs (–kcal/mol).

**Fig. S4** (A) R value, P value and Slope value of the linear fit between binding affinities (–kcal/mol) of 20 lipid transporters to 30 OPEs with 30 OPEs'  $\log K_{ow}$ . (B) R value and P value of correlation analysis between the binding affinities (–kcal/mol) of 20 lipid transporters to 30 OPEs with 30 OPEs' molecular weight. The red dashed line indicates the R value of 0.3. The blue dashed line indicates the P value of 0.05. The black dashed line indicates the slope value of 0.2.

**Fig. S5** OPEs concentrations of (A) OPEs-untreated and (B) OPEs-treated of rice seedlings in shoots and roots ( $\mu\text{g/g}$ ) ( $n \geq 3$ ).

**Fig. S6** Apoplastic and symplast distributions of OPEs in rice roots ( $n \geq 3$ ).

## **Experimental set up**

### **Plant culture and exposure experiments**

Nipponbare (*Oryza sativa* L.) rice seeds were obtained from the Hubei Academy of Agricultural Sciences. Prior to germination, seeds of similar size full grains were surface-sterilized in 5 % (v/v) sodium hypochlorite for 15 min, rinsed thoroughly with deionized water at least three times. Seeds germinated on petri dishes with 2 layers of moist filter paper by dark culture in a constant temperature incubator at 28 °C for 4 d. Then, each batch of 30 uniformly sized seedlings were transferred into glass beakers with 50.0 mL the ten-strength Hoagland nutrient solution for 4 d, and glass beakers were wrapped with aluminium foil. The seedlings were cultured in a growth chamber at a light level of 7.5 klux and a photoperiod of 14 h/d. All the filter paper and deionized water were autoclaved and all glassware was cleaned with methanol and ethyl acetate successively to prevent cross-contamination.

Standard solutions of the above 7 different OPEs dissolved in methanol were appended to the ten-strength Hoagland nutrient solution to make exposure solutions, respectively. The volume of methanol was less than 1‰ (v/v) and the OPEs' concentrations were 100.0 µg/L, which exceeded their environmentally relevant concentration. The seedlings were exposed to 50.0 mL the ten-strength Hoagland nutrient solution with 100.0 µg/L OPE exposure solution for 7 d, respectively, and change exposure solution daily. The seedlings were cultured in a growth chamber at a light level of 7.5 klux and a photoperiod of 14 h/d. The containers were positioned randomly and rerandomized every day. An untreated plant control without OPEs in the nutrient solution (CK) was included to controls to monitor possible cross-contamination and any possible volatilization or abiotic degradation of OPEs. All experiments were replicated at least in triplicate.

### **Extraction and sample preparation**

Extracting and purifying OPEs from rice tissues. Rice seedlings were separated into roots and shoots and thoroughly washed with deionized water and wrapped by filter paper after exposure. Then, samples were ground with liquid nitrogen after precisely weighted, and placed into a 15 mL centrifuge tube to freeze-dry. Next, 5.0 mL of ethyl acetate was added to the tube and vortex mixing for 3 min.

After, the mixture in the tube was extracted for 30 min by ultrasonic and then placed on a horizontal oscillator for 10 min before centrifuged at 5,500 r/min for 10 min. The extraction process was repeated three, then mixed all the extracted supernatant and adjusted to 15.0 mL. The all extracts were added 65.0 mg Florisil, and vortexed for 3 min before centrifuged for 10 min at 5,500 r/min. The supernatant was concentrated by spin evaporation. Finally, the residue was dissolved in 1.0 mL of ethyl acetate and the samples were filtered through a 0.22  $\mu$ m nylon filter membrane for GC-MS analysis.

Extracting and purifying OPEs from nutrient solution. Sodium chloride was added to adjust the ionic strength of nutrient solution sample to 0.086 mol/L. Then, 2 mL of dichloromethane were added and shaken horizontal oscillator for 10 min before leaving it to stand until the organic phase completely separated from the aqueous phase. The organic phase was then transferred to another 50 mL glass tube and dehydrated with anhydrous sodium sulfate. The extracts were added 87.0 mg Florisil, and vortexed for 3 min before centrifuged for 10 min at 5,500 r/min. The supernatant was concentrated by spin evaporation. Finally, the residue was dissolved in 1.0 mL of ethyl acetate and the samples were filtered through a 0.22  $\mu$ m nylon filter membrane for GC-MS analysis.

Fractionation of OPEs in the Apoplast. It was extracted using the vacuum-infiltration–centrifugation method. Rice seedlings were separated into roots and thoroughly washed with deionized water and wrapped by filter paper after exposure, and then put roots/shoot into a brown glass bottle containing infiltration solution. Root weight : infiltration solution = 1 g : 40 mL. The configuration of the infiltration solution is: 0.6 mol/L NaCl, 50 mmol/L Tris-HCl and 0.1% (V/V)  $\beta$ -mercaptoethanol. The brown glass bottle was vacuum infiltrated at 70 KPa for 10 min and then wiped with filter paper. Put the dried root into a 10 mL syringe, then put it into a 50 mL centrifuge tube and centrifuge at 1000 g for 15 min at 4 °C. Repeat three times to obtain the apoplast sap and stored at –20 °C before extraction. After removal of the apoplastic sap, the OPEs in the symplast were present in the remaining roots.

Recoveries were obtained by the addition of OPE standards individually to the untreated plant controls and nutrient solutions before extraction and analysis. In detail, 25 mL, 10 mL and 5 mL 100.0  $\mu$ g/L OPEs expose solution were spiked into the freeze-dried plant materials or as solution then equilibrated for 12 h for solvent volatilization. The scalar recoveries of OPEs methods were replicated

at least in triplicate. The method detection limits (MDL) were defined as three times the signal-to-noise ratio (S/N). The concentrations less than the MDLs were labeled as not detectable (ND).

#### **GC-MS analysis of OPEs**

The concentrations of OPEs were quantified by Shimadzu GC-MS (QP2020, Shimadzu, Japan). An SH-Rxi-1ms column (30 m × 0.25 mm × 0.25 μm) (Shimadzu) was used to separate OPEs, with helium (> 99.999%) as the carrier gas at a flow rate of 1.58 mL/min. The MS system was operated in selected ion monitoring (SIM) mode under electron-impact (EI) ionization with ionization energy of 70 eV for quantitation. The temperature program for the oven was as follows: 0 min at 60 °C, first ramp at 25 °C/min to 190 °C, second ramp at 10 °C/min to 300 °C (8 min hold). The injector and ion source temperatures were maintained at 290 °C and 230 °C, respectively. Sample injection at 3.0 μL was in splitless mode. The time for solvent delay was set to 3 min.

**Table S1** Type, Names, structures, formula and properties of the OPEs in the present study

| Abbreviation | Name                                | CAS NO.    | Structural Formula                                                                   | MF <sup>a</sup>                                  | log $K_{ow}$ <sup>b</sup> | MW <sup>c</sup> |
|--------------|-------------------------------------|------------|--------------------------------------------------------------------------------------|--------------------------------------------------|---------------------------|-----------------|
| Aryl-OPEs    |                                     |            |                                                                                      |                                                  |                           |                 |
| IDDP         | isodecyl diphenyl phosphate         | 29761-21-5 | 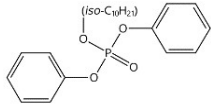   | C <sub>22</sub> H <sub>31</sub> O <sub>4</sub> P | 7.28                      | 390.5           |
| TMPP/TCrP    | tritoyl phosphate                   | 78-32-0    |    | C <sub>21</sub> H <sub>21</sub> O <sub>4</sub> P | 6.34                      | 368.4           |
| TOCP         | tri-o-tolyl phosphate               | 78-30-8    |    | C <sub>21</sub> H <sub>21</sub> O <sub>4</sub> P | 6.34                      | 368.4           |
| EHDPP        | 2-ethylhexyl diphenyl phosphate     | 1241-94-7  |   | C <sub>20</sub> H <sub>27</sub> O <sub>4</sub> P | 5.73                      | 362.4           |
| CDP/CDPP     | (3-methylphenyl) diphenyl phosphate | 26444-49-5 |  | C <sub>19</sub> H <sub>17</sub> O <sub>4</sub> P | 5.3                       | 340.3           |
| TPHP/TPhP    | triphenyl phosphate                 | 115-86-6   |  | C <sub>18</sub> H <sub>15</sub> O <sub>4</sub> P | 4.59                      | 326.3           |
| BDPHP        | butyl diphenyl phosphate            | 2752-95-6  |  | C <sub>16</sub> H <sub>19</sub> O <sub>4</sub> P | 4.41                      | 306.3           |
| DBPHP        | dibutyl phenyl phosphate            | 2528-36-1  |  | C <sub>14</sub> H <sub>23</sub> O <sub>4</sub> P | 4.11                      | 286.3           |
| BMPP         | phosphoric acid bis(p-tolyl) ester  | 843-24-3   |  | C <sub>14</sub> H <sub>15</sub> O <sub>4</sub> P | 3.97                      | 278.2           |
| DPHP         | diphenyl phosphate                  | 838-85-7   |  | C <sub>12</sub> H <sub>11</sub> O <sub>4</sub> P | 2.88                      | 250.2           |

(continued on next page)

**Table S1** (continued)

| Abbreviation | Name                                 | CAS NO.   | Structural Formula                                                                   | MF <sup>a</sup>                                  | log $K_{ow}$ <sup>b</sup> | MW <sup>c</sup> |
|--------------|--------------------------------------|-----------|--------------------------------------------------------------------------------------|--------------------------------------------------|---------------------------|-----------------|
| Alkyl-OPEs   |                                      |           |                                                                                      |                                                  |                           |                 |
| TEHP         | tris(2-ethylhexyl) phosphate         | 78-42-2   | 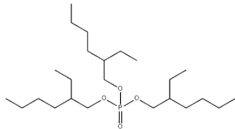   | C <sub>24</sub> H <sub>51</sub> O <sub>4</sub> P | 9.49                      | 434.7           |
| BEHP         | bis(2-ethylhexyl) hydrogen phosphate | 298-07-7  |    | C <sub>16</sub> H <sub>35</sub> O <sub>4</sub> P | 6.07                      | 322.4           |
| TrMP         | tripentyl phosphate                  | 2528-38-3 |    | C <sub>15</sub> H <sub>33</sub> O <sub>4</sub> P | 5.29                      | 308.4           |
| TBP/TnBP     | tri-n-butyl phosphate                | 126-73-8  |    | C <sub>12</sub> H <sub>27</sub> O <sub>4</sub> P | 4                         | 266.3           |
| TBEP         | tris(2-butoxyethyl) phosphate        | 78-51-3   |   | C <sub>18</sub> H <sub>39</sub> O <sub>7</sub> P | 3.75                      | 398.5           |
| TiBP         | tris(2-methylpropyl) phosphate       | 126-71-6  |  | C <sub>12</sub> H <sub>27</sub> O <sub>4</sub> P | 3.6                       | 266.3           |
| DPrP         | dipropyl hydrogen phosphate          | 1804-93-9 |  | C <sub>6</sub> H <sub>15</sub> O <sub>4</sub> P  | 1.31                      | 182.2           |
| TEP          | triethyl phosphate                   | 78-40-0   |  | C <sub>6</sub> H <sub>15</sub> O <sub>4</sub> P  | 0.87                      | 182.2           |
| DEP          | diethyl phosphate                    | 598-02-7  |  | C <sub>4</sub> H <sub>11</sub> O <sub>4</sub> P  | 0.32                      | 154.1           |
| TMP          | trimethyl phosphate                  | 512-56-1  |  | C <sub>3</sub> H <sub>9</sub> O <sub>4</sub> P   | -0.6                      | 140.1           |

(continued on next page)

**Table S1** (continued)

| Abbreviation                 | Name                                    | CAS NO.    | Structural Formula                                                                   | MF <sup>a</sup>          | log $K_{ow}$ <sup>b</sup> | MW <sup>c</sup> |
|------------------------------|-----------------------------------------|------------|--------------------------------------------------------------------------------------|--------------------------|---------------------------|-----------------|
| <b>Halogenated alky-OPEs</b> |                                         |            |                                                                                      |                          |                           |                 |
| TDBPP                        | tris(2,3-dibromopropyl) phosphate       | 126-72-7   | 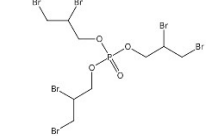   | $C_9H_{15}Br_6O_4P$      | 4.19                      | 697.6           |
| TDCP                         | tris(2,3-dichloropropyl) phosphate      | 78-43-3    |    | $C_9H_{15}Cl_6O_4P$      | 3.65                      | 430.9           |
| TDCPP                        | tris(1,3-dichloropropan-2-yl) phosphate | 13674-87-8 |    | $C_9H_{15}Cl_6O_4P$      | 3.65                      | 430.9           |
| V6                           | 2,2-bis(chloromethyl) trimethylene      | 38051-10-4 |   | $C_{13}H_{24}Cl_6O_8P_2$ | 3.31                      | 583             |
| T3CIPP                       | tris(3-chloropropyl) phosphate          | 1067-98-7  |  | $C_9H_{18}Cl_3O_4P$      | 3.11                      | 327.6           |
| TCIPP                        | tris(2-chloropropyl) phosphate          | 6145-73-9  |  | $C_9H_{18}Cl_3O_4P$      | 2.89                      | 327.6           |
| TCPP                         | tris(1-chloropropan-2-yl) phosphate     | 13674-84-5 |  | $C_9H_{18}Cl_3O_4P$      | 2.89                      | 327.6           |
| BDCIPP                       | bis(2,3-dichloropropyl) phosphate       | 37509-70-9 |  | $C_6H_{11}Cl_4O_4P$      | 2.18                      | 319.9           |
| TCEP                         | tris(2-chloroethyl) phosphate           | 115-96-8   |  | $C_6H_{12}Cl_3O_4P$      | 1.63                      | 285.5           |
| BCEP                         | bis(2-chloroethyl) hydrogen phosphate   | 3040-56-0  |  | $C_4H_9Cl_2O_4P$         | 0.83                      | 223             |

**NOTE:**

All the values of properties are generated using the US Environmental Protection Agency's EPISuite™ (<https://www.epa.gov/tsca-screening-tools>).

a: MF=Molecular formula; b:  $K_{ow}$ =Octanol-water partition coefficient, c: MW=Molecular weight.



**Table S2** Types, Abbreviation, Name and Accession of the lipid transporter in the present study

| Type        | Abbreviation | Name                                         | Accession      |
|-------------|--------------|----------------------------------------------|----------------|
| lipocalins  | OsTIL        | temperature-induced lipocalin-1              | XP_015627280.1 |
|             | OsCHL        | chloroplastic lipocalin                      | XP_015635937.1 |
|             | OsVDE        | violaxanthin de-epoxidase                    | XP_015636342.1 |
|             | OsUN         | uncharacterized LOC4325583                   | XP_015621660.1 |
|             | OsZEP1       | zeaxanthin epoxidase                         | NP_001406295.1 |
|             | OsZEP2       | monooxygenase 2                              | XP_025880216.1 |
| nsLTPs      | OsLTP1       | non-specific lipid-transfer protein 1-like   | NP_001391564.1 |
|             | OsLTP2       | non-specific lipid-transfer protein 2-like   | NP_001404088.1 |
|             | OsLTP2A      | non-specific lipid-transfer protein 2        | NP_001391721.1 |
|             | OsLTP2B      | non-specific lipid-transfer protein 2B-like  | NP_001391563.1 |
|             | OsLTP3       | non-specific lipid-transfer protein 3-like   | NP_001391371.1 |
|             | OsLTP4       | non-specific lipid-transfer protein 4-like   | XP_015618920.1 |
|             | OsLTPC4      | non-specific lipid-transfer protein C4-like  | NP_001391821.1 |
|             | OsLTPC6      | non-specific lipid-transfer protein C6-like  | XP_015615738.1 |
| apoproteins | OsLTPL1      | non-specific lipid transfer protein-like 1   | NP_001389094.1 |
|             | OsPsaA       | PSI P700 apoprotein A1                       | NP_039383.1    |
|             | OsPsaB       | PSI P700 apoprotein A2                       | NP_039382.1    |
|             | OsPsbB       | photosystem II P680 chlorophyll A apoprotein | NP_039411.1    |
| PR-10s      | OsMLP        | MLP-like protein 423                         | XP_015634232.1 |
|             | OsPR-10      | pathogenesis-related protein 10              | XP_015620489.1 |

**Table S3** Subcellular localization prediction of lipid transporters

| protein  | GPI <sup>a</sup> | TargetP <sup>b</sup>                                                                                                                                          | Plant-mPLOC <sup>c</sup>                                                          |
|----------|------------------|---------------------------------------------------------------------------------------------------------------------------------------------------------------|-----------------------------------------------------------------------------------|
| OsCHL    | 0                | Thylakoid luminal transfer peptide (0.7188);<br>Chloroplast transfer peptide (0.2269)                                                                         | Cell membrane                                                                     |
| OsTIL    | 0                | Mitochondrial transfer peptide (0.0004);<br>Signal peptide (0.0003)                                                                                           | Cell membrane; Cell wall;<br>Chloroplast; Cytoplasm;<br>Golgi apparatus; Nucleus. |
| OsVED    | 0                | Thylakoid luminal transfer peptide (0.4687)                                                                                                                   | Chloroplast                                                                       |
| OsZEP1   | 0                | Chloroplast transfer peptide (0.9269)                                                                                                                         | Chloroplast                                                                       |
| OsZEP2   | 0                | Mitochondrial transfer peptide (0.0001)                                                                                                                       | Chloroplast                                                                       |
| OsPasA   | 0                | Signal peptide (0.0104);<br>Mitochondrial transfer peptide (0.0002)                                                                                           | Chloroplast                                                                       |
| OsPsaB   | 0                | Mitochondrial transfer peptide (0.0414);<br>Thylakoid luminal transfer peptide (0.0069);<br>Signal peptide (0.0059);<br>Chloroplast transfer peptide (0.0009) | Chloroplast                                                                       |
| OsPsbB   | 0                | Mitochondrial transfer peptide (0.0524);<br>Signal peptide (0.0109);<br>Chloroplast transfer peptide (0.0009);<br>Thylakoid luminal transfer peptide (0.0001) | Chloroplast; Plastid.                                                             |
| OsUN     | 0                | Chloroplast transfer peptide (0.9433)                                                                                                                         | Chloroplast                                                                       |
| OsLTP1   | 0                | Signal peptide (1)                                                                                                                                            | Cell wall                                                                         |
| OsLTPL2  | 0                | Signal peptide (1)                                                                                                                                            | Cell membrane                                                                     |
| OsLTPL2A | 0                | Signal peptide (1)                                                                                                                                            | Cell wall                                                                         |
| OsLTPL2B | 0                | Signal peptide (1)                                                                                                                                            | Cell wall                                                                         |
| OsLTPL3  | 0                | Signal peptide (1)                                                                                                                                            | Cell membrane                                                                     |
| OsLTPL4  | 0                | Signal peptide (1)                                                                                                                                            | Cell wall                                                                         |
| OsLTPLC4 | 0                | Signal peptide (1)                                                                                                                                            | Cell membrane                                                                     |
| OsLTPLC6 | 0                | Signal peptide (1)                                                                                                                                            | Cell membrane                                                                     |
| OsLTPL1  | 149              | Signal peptide (1)                                                                                                                                            | Cell membrane                                                                     |
| OsMLP    | 0                | Signal peptide (0.0004);<br>Mitochondrial transfer peptide (0.0001)                                                                                           | Cytoplasm                                                                         |
| OsPR-10  | 0                | Signal peptide (0.0137);<br>Mitochondrial transfer peptide (0.0008);<br>Chloroplast transfer peptide (0.0001)                                                 | Cytoplasm                                                                         |

<sup>a</sup>: GPI Modification Site Prediction website: [https://mendel.imp.ac.at/gpi/gpi\\_server.html](https://mendel.imp.ac.at/gpi/gpi_server.html);

<sup>b</sup>: TargetP website: <https://services.healthtech.dtu.dk/services/TargetP-2.0/>;

<sup>c</sup>: Plant-mPLOC website: <http://www.csbio.sjtu.edu.cn/bioinf/plant-multi/>.

**Table S4** The lipid transporter structural assessment by Procheck and ProSA

|         | Procheck <sup>a</sup>        |                                   |                                   | ProSA <sup>b</sup>        |         |
|---------|------------------------------|-----------------------------------|-----------------------------------|---------------------------|---------|
|         | Most favoured<br>regions (%) | Additional allowed<br>regions (%) | Generously allowed<br>regions (%) | Disallowed<br>regions (%) | Z-Score |
| OsTIL   | 89.2                         | 10.8                              | 0.0                               | 0.0                       | −6.16   |
| OsCHL   | 70.0                         | 24.1                              | 3.8                               | 2.1                       | −4.49   |
| OsVDE   | 78.7                         | 14.8                              | 3.6                               | 2.9                       | −6.44   |
| OsUN    | 83.4                         | 13.8                              | 1.7                               | 1.1                       | −10.28  |
| OsZEP1  | 84.9                         | 11.8                              | 2.4                               | 0.9                       | −10.20  |
| OsZEP2  | 82.6                         | 13.5                              | 2.5                               | 1.4                       | −5.34   |
| OsLTP1  | 93.9                         | 6.1                               | 0.0                               | 0.0                       | −4.61   |
| OsLTP2  | 93.5                         | 5.2                               | 1.3                               | 0.0                       | −4.22   |
| OsLTP2A | 96.0                         | 4.0                               | 0.0                               | 0.0                       | −4.73   |
| OsLTP2B | 94.9                         | 5.1                               | 0.0                               | 0.0                       | −4.60   |
| OsLTP3  | 94.4                         | 5.6                               | 0.0                               | 0.0                       | −4.06   |
| OsLTP4  | 96.0                         | 3.0                               | 0.0                               | 0.0                       | −3.81   |
| OsLTPC4 | 97.4                         | 2.6                               | 0.0                               | 0.0                       | −2.61   |
| OsLTPC6 | 84.4                         | 11.9                              | 2.8                               | 0.9                       | −5.16   |
| OsLTPL1 | 86.4                         | 8.8                               | 2.7                               | 2.0                       | −5.05   |
| OsPsaA  | 92.4                         | 7.1                               | 0.5                               | 0.0                       | −7.24   |
| OsPsaB  | 93.4                         | 6.2                               | 0.2                               | 0.3                       | −7.79   |
| OsPsbB  | 93.3                         | 6.7                               | 0.0                               | 0.0                       | −4.95   |
| OsMLP   | 95.0                         | 4.3                               | 0.7                               | 0.0                       | −6.58   |
| OsPR-10 | 91.9                         | 8.1                               | 0.0                               | 0.0                       | −5.76   |

<sup>a</sup>: Procheck website: <https://www.ebi.ac.uk/thornton-srv/software/PROCHECK/index.html>;

<sup>b</sup>: ProSA-website: <https://prosa.services.came.sbg.ac.at/>.

**Table S5** OPE congeners confirmation and quantitation ions and retention times (RT)

| OPEs  | Confirmation ion (m/z) | Quantitation ion (m/z) |     | RT (min) |
|-------|------------------------|------------------------|-----|----------|
| TEHP  | 99                     | 113                    | 57  | 12.565   |
| TMPP  | 368                    | 367                    | 107 | 14.075   |
| CDP   | 340                    | 339                    | 77  | 13.090   |
| TBEP  | 57                     | 45                     | 56  | 12.155   |
| TDCPP | 75                     | 99                     | 191 | 11.600   |
| TCEP  | 63                     | 249                    | 251 | 7.280    |
| TEP   | 99                     | 155                    | 127 | 3.455    |

**Table S6** Scalar recovery and method detection limit (MDL) of seven different OPEs (n ≥ 3)

| OPEs  | Recovery (%) |               | MDL* (ug/g) |
|-------|--------------|---------------|-------------|
|       | solution     | plant tissues |             |
| TEHP  | 86.1         | 98.2          | 0.00308     |
| TMPP  | 77.7         | 97.8          | 0.00342     |
| CDP   | 78.6         | 111.3         | 0.02394     |
| TBEP  | 129.4        | 94.5          | 0.00684     |
| TDCPP | 115.8        | 97.3          | 0.06738     |
| TCEP  | 122.5        | 95.2          | 0.01163     |
| TEP   | 66.4         | 96.5          | 0.00342     |

\* The MDL was determined for the instrument.

**Table S7** Gene ID of 6 lipid transporters and their primers used in qPCR

| gene           | Gene ID | Primer sequence |                        |
|----------------|---------|-----------------|------------------------|
| <i>18s</i>     | 4333919 | F               | GCCGTCCTCTCTCTGTATGC   |
|                |         | R               | GGGGACAGTGTGGCTGAC     |
| <i>OsTIL</i>   | 4329967 | F               | GGTGGTTCAAGTCGCTCTTC   |
|                |         | R               | GCTATACATCGTCGTCCTCTG  |
| <i>OsLTP2</i>  | 4331362 | F               | GTCTTGCGGTCATCTCGTCAC  |
|                |         | R               | GAACTGACCACCCAAGCACA   |
| <i>OsLTP4</i>  | 4351314 | F               | CTGCTTACCTGTTGCTTCGTC  |
|                |         | R               | CCCTCGTCCCGTAAAGGAG    |
| <i>OsLTPL1</i> | 4332993 | F               | ACAGTTTGTCGTTGTGATCGTG |
|                |         | R               | TTAATCACGGCAGGGTGCAT   |
| <i>OsMLP</i>   | 4336091 | F               | CCTCAAGTACACCGAAGGGGTG |
|                |         | R               | GTACGACACCACCTTCTTCTCG |
| <i>OsPR-10</i> | 4352487 | F               | GAAGCTCAACCCTGCTGTGG   |
|                |         | R               | TGACTTGATAATGTGAGCTGCG |

**Table S8** Analysis of covariance results of OPEs binding affinities with numbers of benzene rings, carbon in main chain, Halogenated group and  $\log K_{ow}$

|                       | Factors                         | F      | p-Value | Partial Eta squared |
|-----------------------|---------------------------------|--------|---------|---------------------|
| Aryl-OPEs             | Numbers of benzene rings        | 10.623 | < 0.001 | 0.098               |
|                       | $\log K_{ow}$                   | 0.393  | 0.531   | 0.002               |
| Alky-OPEs             | Numbers of carbon in main chain | 5.547  | < 0.001 | 0.841               |
|                       | $\log K_{ow}$                   | 0.589  | 0.444   | 0.003               |
| Halogenated alky-OPEs | Numbers of Halogenated group    | 0.709  | 0.548   | 0.011               |
|                       | $\log K_{ow}$                   | 0.047  | 0.828   | 0.000               |

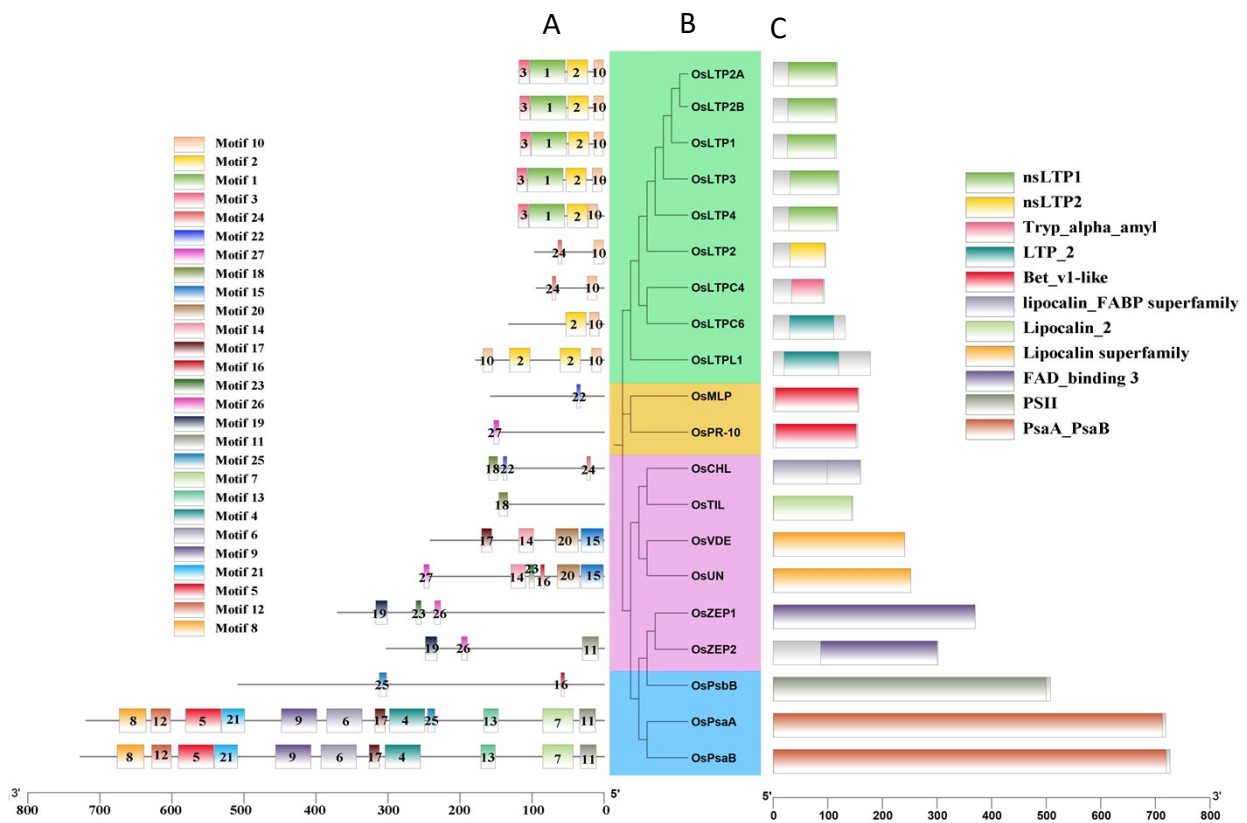

**Fig. S1** (A) conserved motifs, (B) Phylogenetic analysis, (C) conserved domains of 20 lipid transporters.



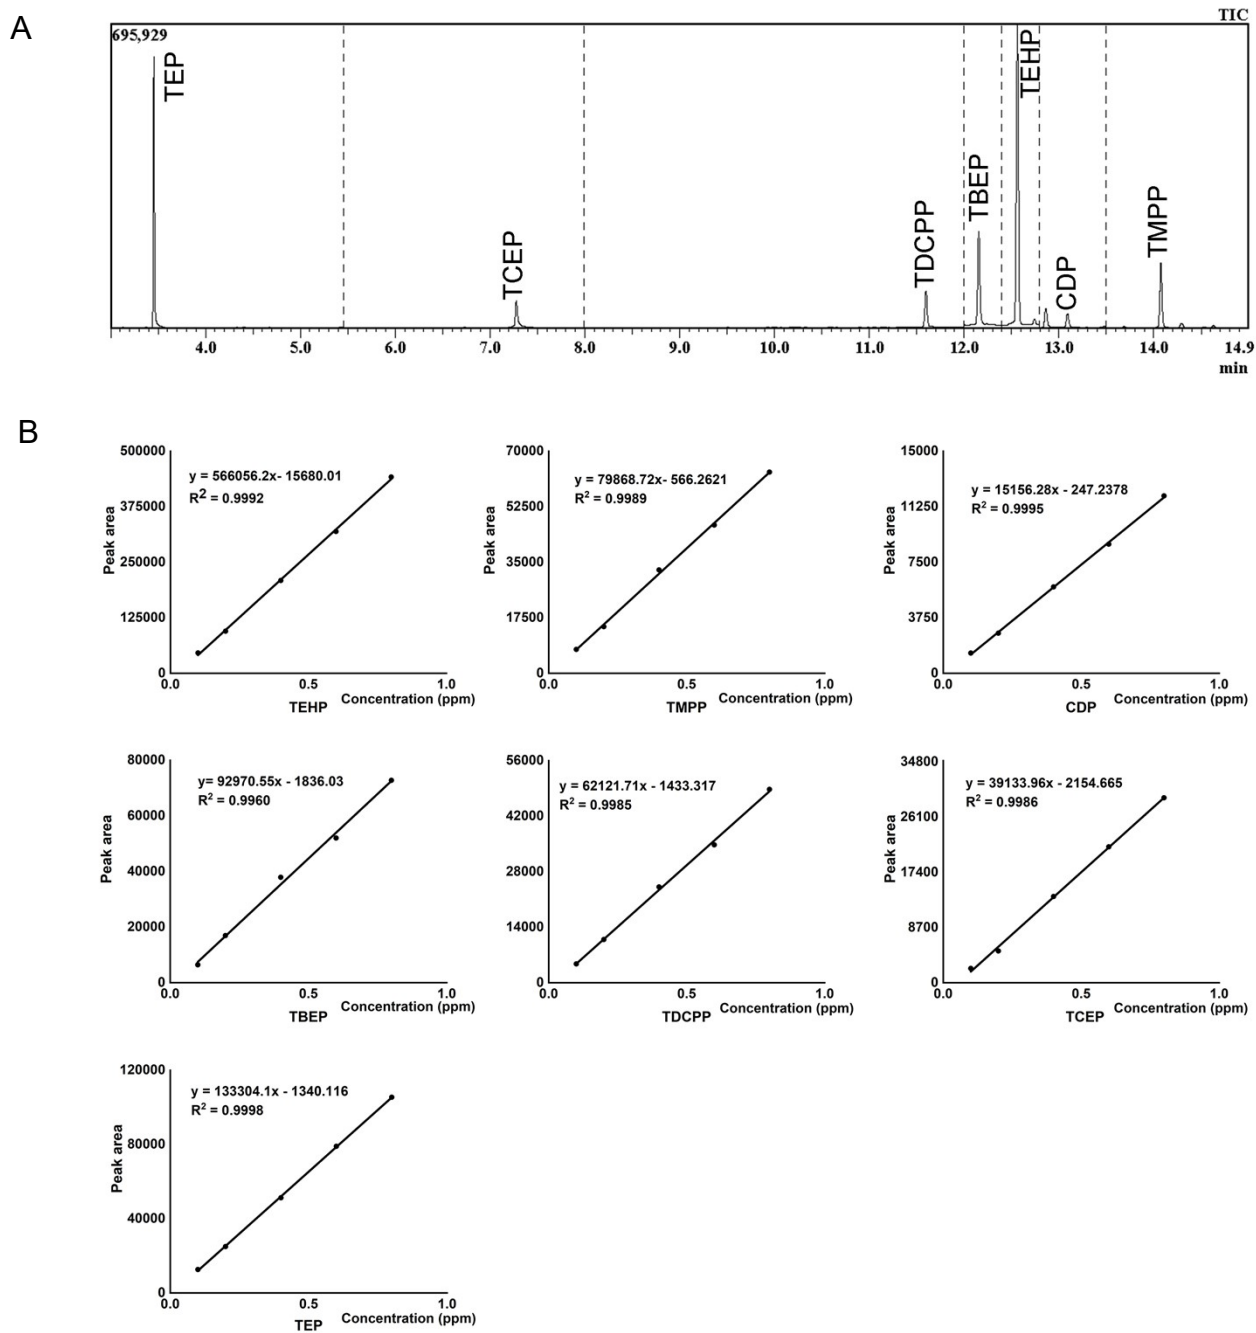

**Fig. S2** (A) The chromatogram and (B) standard curve of 7 different OPEs.

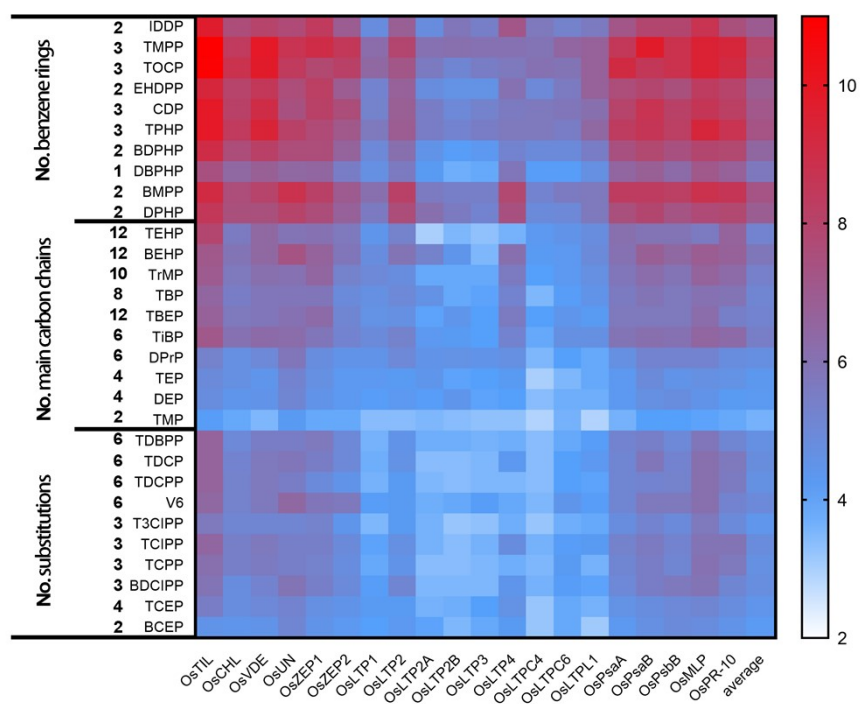

**Fig. S3** Binding affinities Heatmap showing 20 lipid transporters to 30 OPEs and average binding affinity

of 30 OPEs (–kcal/mol).

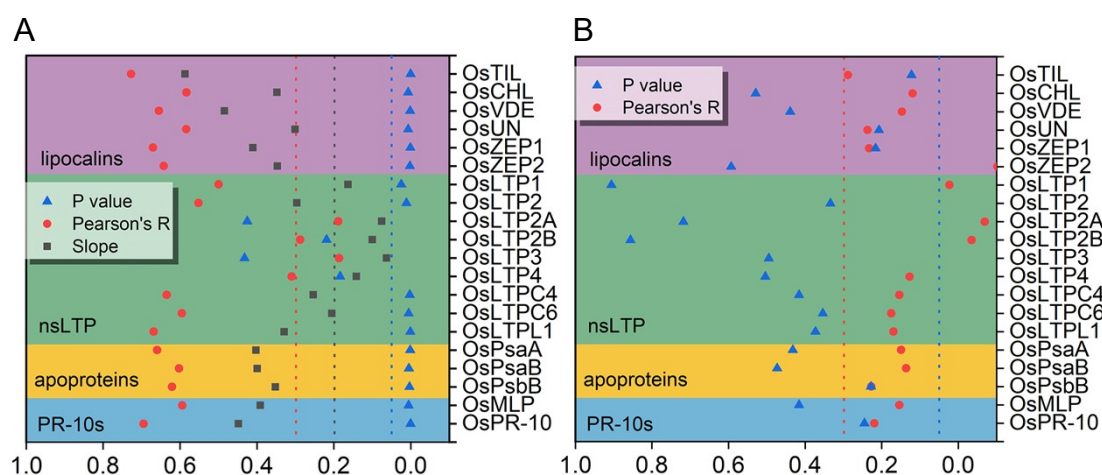

**Fig. S4** (A) R value, P value and Slope value of the linear fit between binding affinities ( $-kcal/mol$ ) of 20 lipid transporters to 30 OPEs with 30 OPEs'  $\log K_{ow}$ . (B) R value and P value of correlation analysis between the binding affinities ( $-kcal/mol$ ) of 20 lipid transporters to 30 OPEs with 30 OPEs' molecular weight. The red dashed line indicates the R value of 0.3. The blue dashed line indicates the P value of 0.05. The black dashed line indicates the slope value of 0.2.

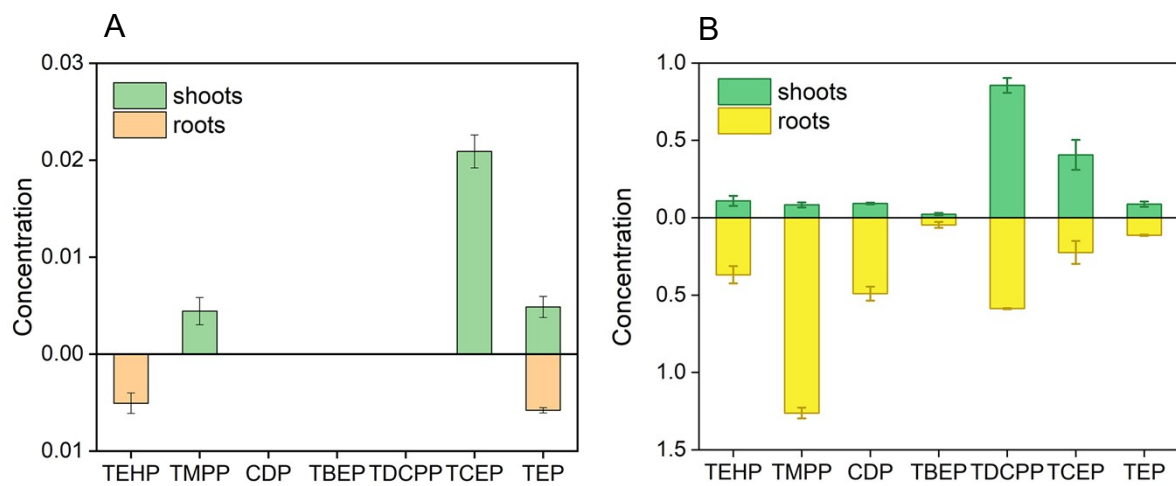

**Fig. S5** OPEs concentrations of (A) OPEs-untreated and (B) OPEs-treated of rice seedlings in shoots and roots (µg/g) (n ≥ 3).

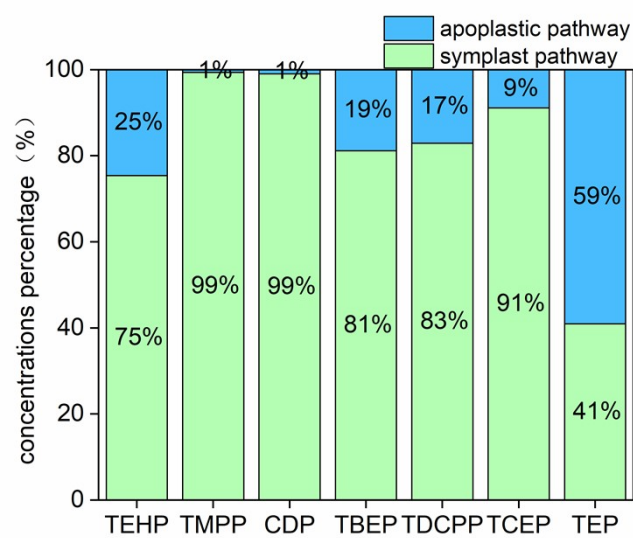

**Fig. S6** Apoplastic and symplast distributions of OPEs in rice roots ( $n \geq 3$ ).
